# Supplementary material
Source: PubMed Central journal article supplement (PMC1500994)
Supplement: 7601187s1.pdf [file 7601187s1.pdf]

## Supplementary figure 1. Characterization of Eed deficient ES cells.

**A.** Schematic representation of the *Eed* gene locus, targeting vector (above) and targeted allele. Exons (black boxes), loxP sites (triangles), WD40 domains encoded by exons 3 to 5, the position of probes (open bars), and GC-rich region (gray crescent) are indicated. **B.** Bars represent the relative colony forming efficiency of indicated ES cell lines (clone 36 was set to 1). Error bars represent the standard deviation. **C.** Proliferation and self-renewal is not dependent on Eed. Cumulative cell numbers of indicated ES cell lines cultured in the presence of LIF for 3 days. To correct for the colony formation defect in  $Eed^{-/-}$  ES cells 36<sup>*Eed*<sup>-/-</sup></sup> and  $\Delta SX$  cells were seeded in an appropriate ratio compared to clone 36 cells. **D.** Normal proliferation of differentiated Eed deficient cells under adherent cell culture conditions. The graph shows cumulative cell numbers for clone 36, 36<sup>*Eed*<sup>-/-</sup></sup>, 36<sup>*Eed*<sup>TG</sup></sup>,  $\Delta SX$  and  $\Delta SX^{Eed^{-/-}}$  ES cells differentiated with all-*trans*-retinoic acid for 9 days. **E.** Impaired embryoid body formation of *Eed* deficient ES cells. Representative images of embryoid bodies derived from clone 36 and 36<sup>*Eed*<sup>-/-</sup></sup> ES cells after one week. **F.** Expression of the EGFP-Eed fusion protein in 36<sup>*Eed*<sup>TG</sup></sup> cells causes restoration of PRC2 function. Immunofluorescence / RNA FISH showing recruitment of the EGFP-Eed fusion protein (green) in 36<sup>*Eed*<sup>TG</sup></sup> cells by *Xist* restoring efficient tri-methylation of histone H3K27 (red). Below, combined immunofluorescence / RNA FISH showing Mph1 recruitment by *Xist* in 36<sup>*Eed*<sup>TG</sup></sup> cells. DNA was stained with DAPI (blue).

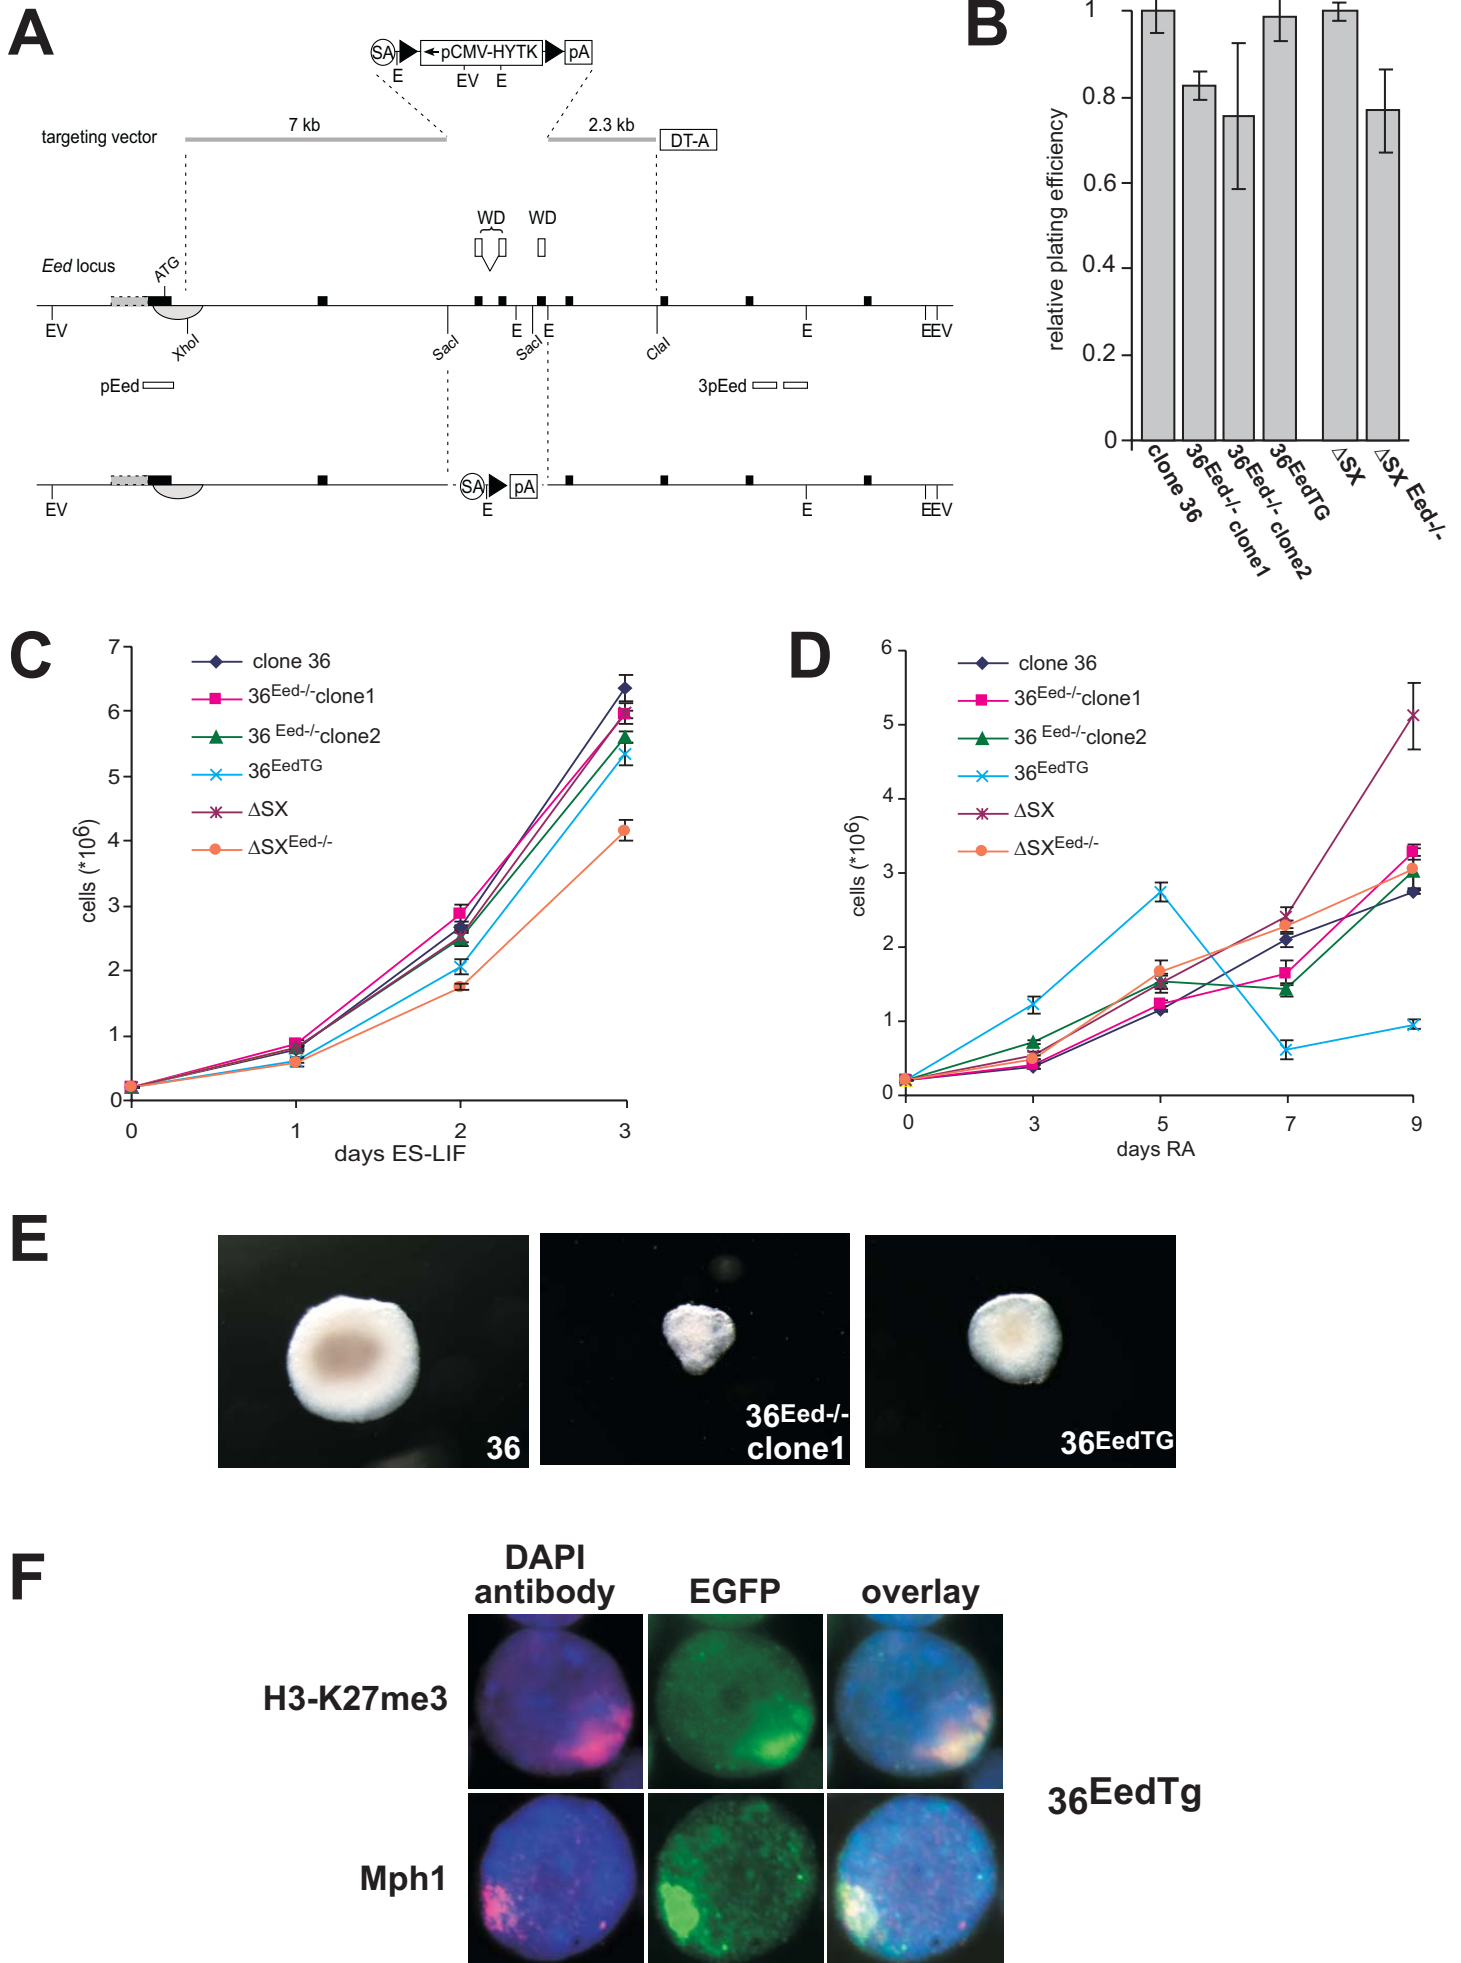

Supplementary Figure 1
