# Supplementary material
Source: PubMed Central journal article supplement (PMC1500994)
Supplement: 7601187s3.pdf [file 7601187s3.pdf]

**Supplementary figure 3. Quantitative measurements of histone H3 lysine 9 methylation.**

Data obtained by quantitative mass spectrometric analyses for H3K9 methylation in nuclear extracts of ES cells cultivated in the presence (+dox) or absence (-dox) of doxycycline. The mean of three independent measurements is shown. The percentage of the indicated histone modification is given, errorbars represent standard deviation.

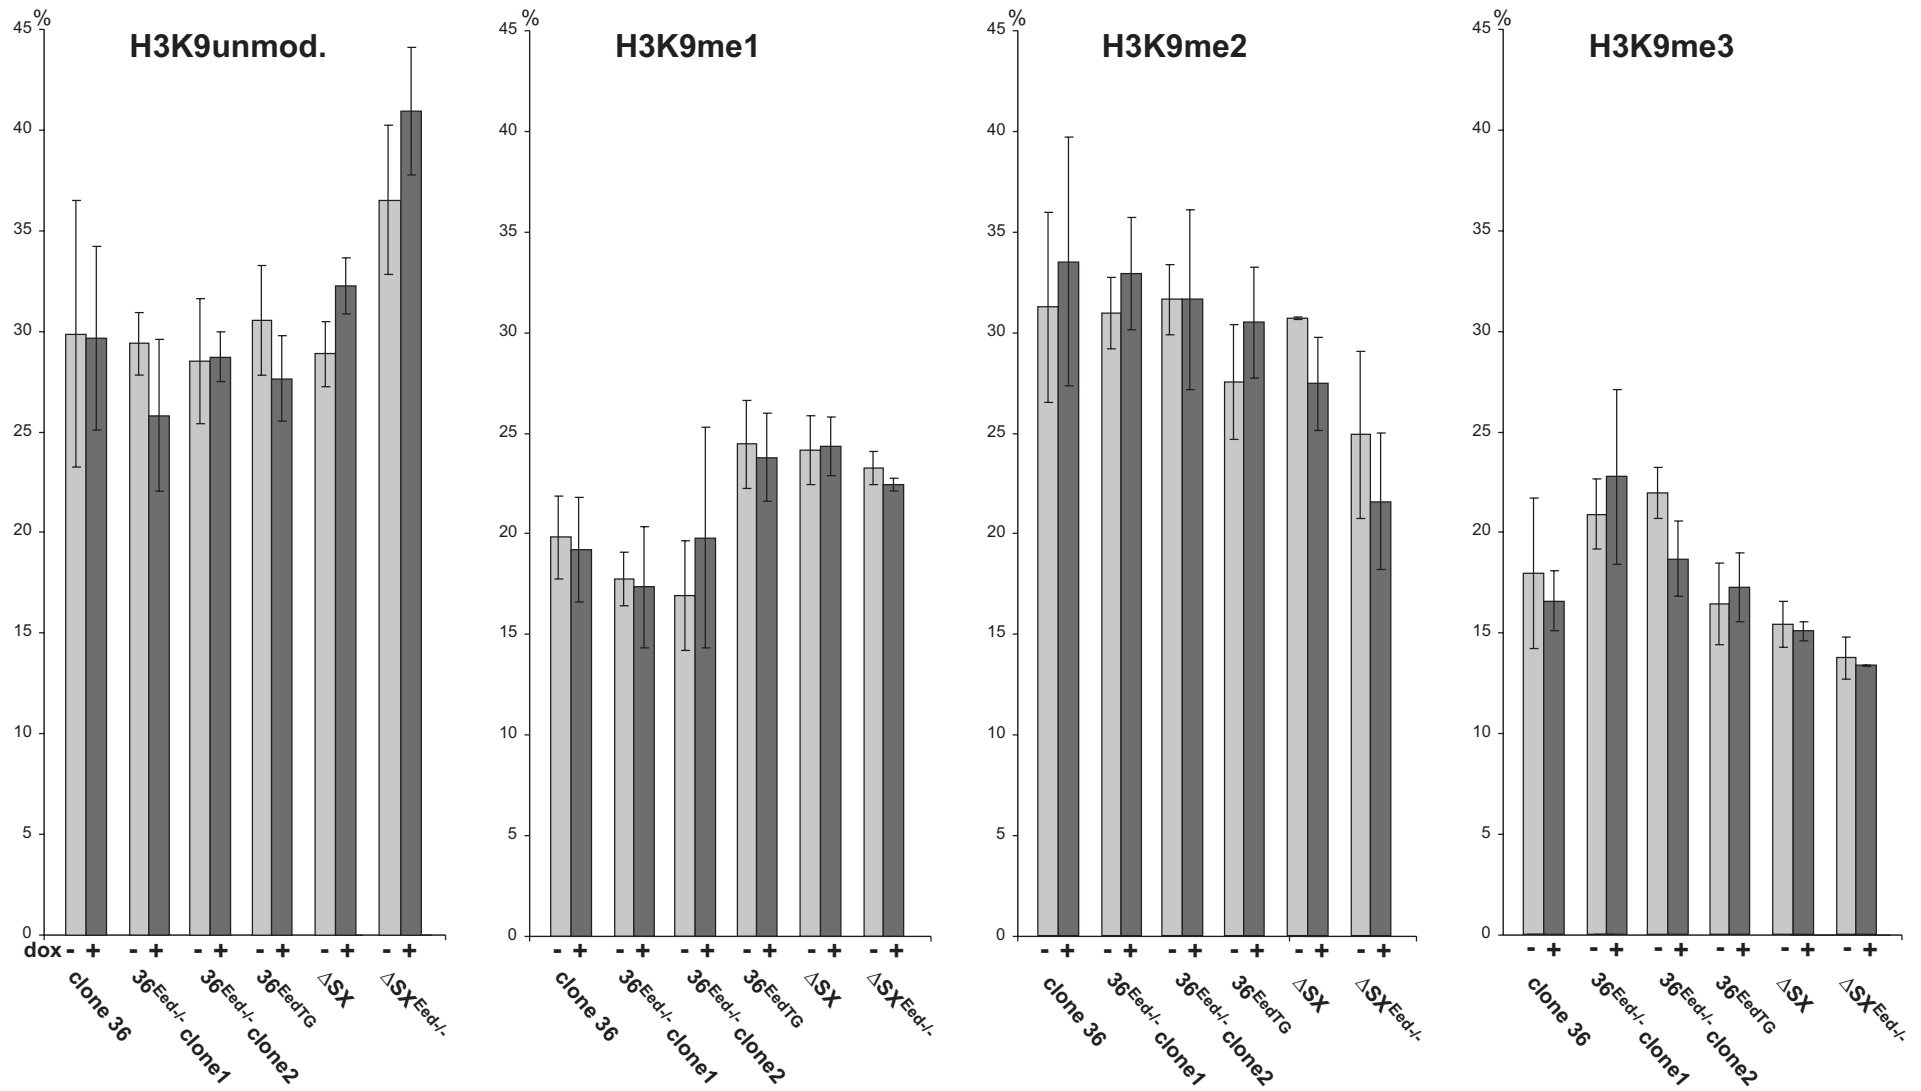

**Supplementary Figure 3**
