# Supplementary material
Source: PubMed Central journal article supplement (PMC1500994)
Supplement: 7601187s4.pdf [file 7601187s4.pdf]

**Supplementary figure 4. Quantitative measurements of histone H3 lysine 27 methylation.** Data obtained by quantitative mass spectrometric analyses for H3K27 methylation as in Supplementary figure 3.

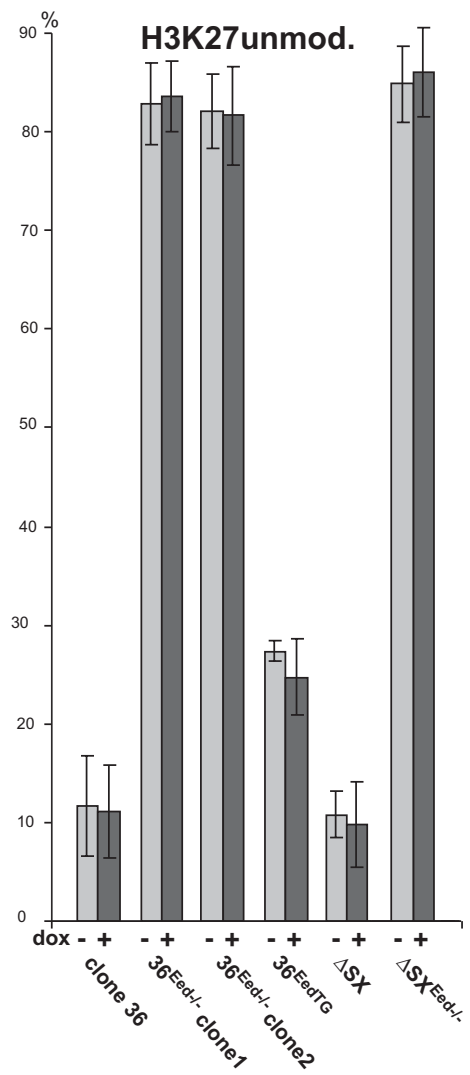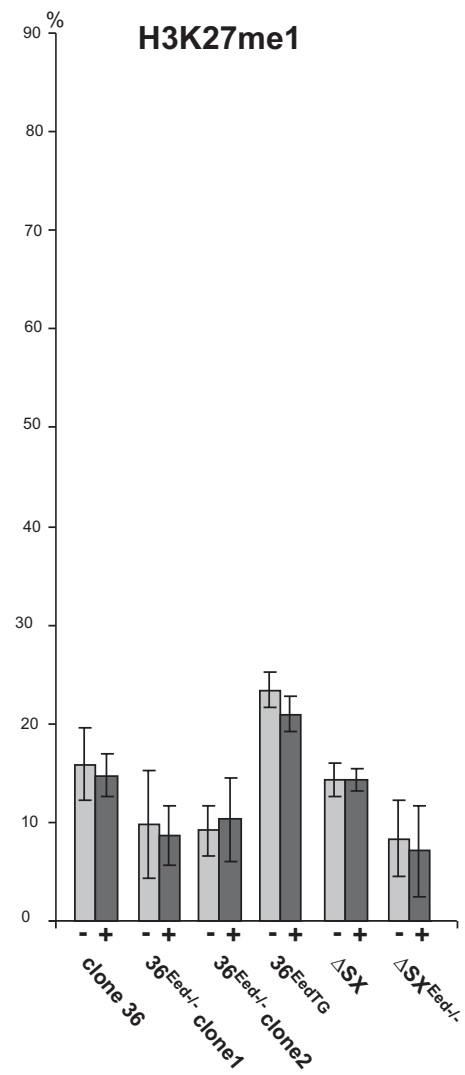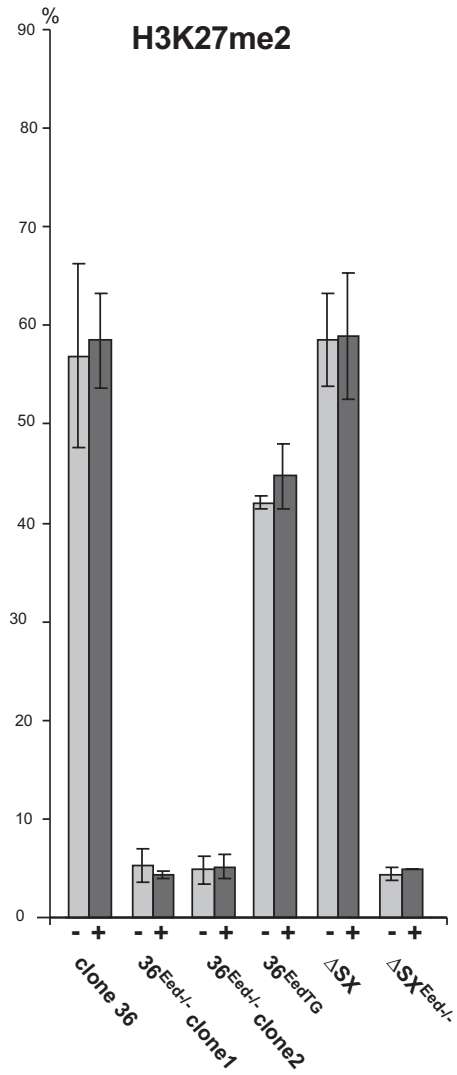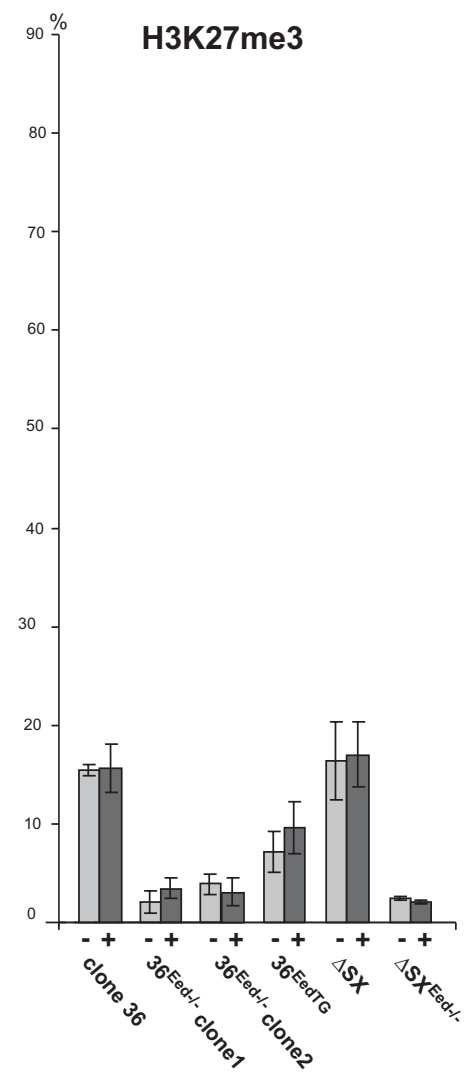

**Supplementary Figure 4**
