# Supplementary material
Source: PubMed Central journal article supplement (PMC1500994)
Supplement: 7601187s5.pdf [file 7601187s5.pdf]

**Supplementary figure 5. Quantitative measurements of histone H3 lysine 36 methylation.** Data obtained by quantitative mass spectrometric analyses for H3K36 methylation as in Supplementary figure 3. Tri-methylation of histone H3 lysine 36 is not present in mammalian cells.

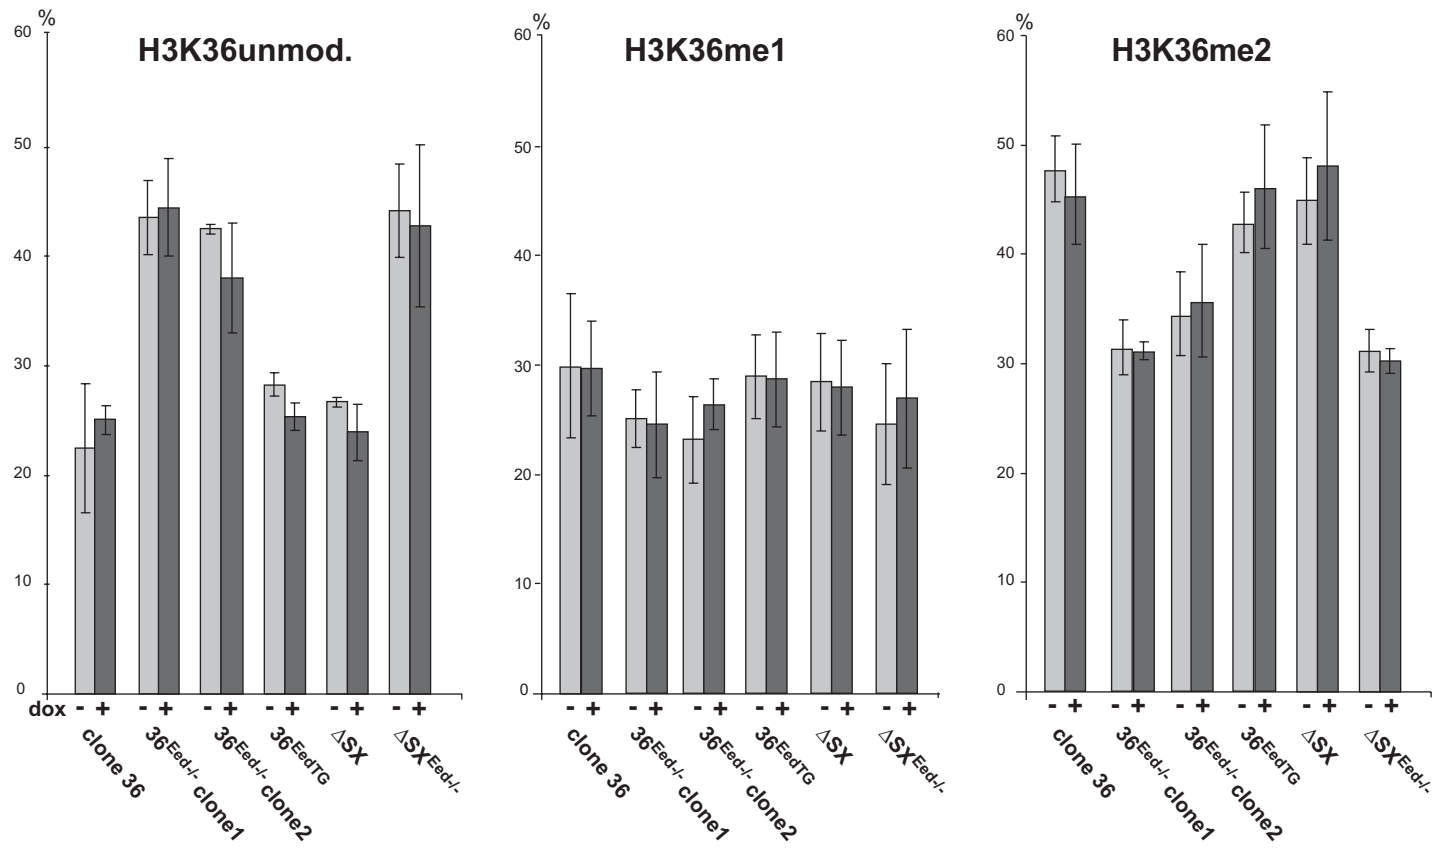

**Supplementary Figure 5**
